# Supplementary material for: Quantitative spatial and temporal assessment of regulatory element activity in zebrafish
Source: eLife. 2021 Nov 19;10:e65601. doi: 10.7554/eLife.65601 (PMC8604437; doi:10.7554/eLife.65601)
Supplement: Figure 3—source data 1. [file elife-65601-fig3-data1.xlsx]

## Sheet: Sheet1
Dual-CRE dual-reporter transgenic line
			Mean G/C	avg G/C	stdev G/C	Mean C/G	avg C/G	stdev C/G			p-values: t-test
PAX6-SIMOeGFP/-/PAX6-7CE3mCherry	Lgfp/-/Hchr	L-72	0.971534	1.09858	0.178619	1.0293	0.931362	0.148805			G/C	C/G
			0.941743			1.06186				L-72hpf
			0.894743			1.11764				Lchr/-/Hgfp vs Lgfp/-/Hchr	0.38621	0.433502
			0.95035			1.05224				Lchr/-/Hgfp vs Lchr/1XI/Hgfp	0.0116325	0.00302591
			1.35014			0.740662				Lchr/-/Hgfp vs Lchr/2XI/Hgfp	0.000190414	1.0666e-06
			1.25475			0.796971				Lchr/-/Hgfp vs Lchr/3XI/Hgfp	7.49802e-05	4.30296e-06
			1.26443			0.790868				L-120hpf
			1.16097			0.861351				Lchr/-/Hgfp vs Lgfp/-/Hchr	0.0416431	0.0452472
		L-120	0.89	0.861225	0.038697	1.1236	1.16325	0.0538221		Lchr/-/Hgfp vs Lchr/1XI/Hgfp	0.043272	0.0283695
			0.854752			1.16993				Lchr/-/Hgfp vs Lchr/2XI/Hgfp	2.43427e-10	1.60032e-07
			0.827498			1.20846				Lchr/-/Hgfp vs Lchr/3XI/Hgfp	1.1401e-16	2.01785e-11
			0.851805			1.17398				H-72hpf
			0.882105			1.13365				Lchr/-/Hgfp vs Lgfp/-/Hchr	0.000539842	0.00654064
			0.910564			1.09822				Lchr/-/Hgfp vs Lchr/1XI/Hgfp	0.182978	0.175253
			0.882888			1.13265				Lchr/-/Hgfp vs Lchr/2XI/Hgfp	0.00768311	0.00641828
			0.790187			1.26552				Lchr/-/Hgfp vs Lchr/3XI/Hgfp	3.51706e-06	2.42085e-09
		H-72	0.927727	0.854692	0.0687556	1.0779	1.1757	0.0943483		H-120hpf
			0.898085			1.11348				Lchr/-/Hgfp vs Lgfp/-/Hchr	0.762863	0.904607
			0.786804			1.27096				Lchr/-/Hgfp vs Lchr/1XI/Hgfp	0.00102229	1.18722e-05
			0.806152			1.24046				Lchr/-/Hgfp vs Lchr/2XI/Hgfp	0.0301589	0.000645585
		H-120	0.805278	0.886027	0.117418	1.24181	1.1454	0.147717		Lchr/-/Hgfp vs Lchr/3XI/Hgfp	1.31223e-05	3.68605e-09
			0.778775			1.28407
			0.769609			1.29936
			1.02149			0.978966
			1.00182			0.998184
			1.00741			0.992642
			0.817809			1.22278
PAX6-SIMOmCherry/-/PAX6-7CE3eGFP	Lchr/-/Hgfp	L-72	0.984437	1.21151	0.207265	1.01581	0.845797	0.14942
			1.00522			0.994812
			1.28572			0.777771
			1.32901			0.752442
			1.45317			0.688149
		L-120	0.898569	0.912689	0.0494784	1.11288	1.09843	0.0595754
			0.891751			1.12139
			0.940445			1.06333
			0.983107			1.01718
			0.956854			1.04509
			0.876613			1.14075
			0.841486			1.18837
		H-72	1.04556	1.16717	0.0873375	0.956427	0.86068	0.0654453
			1.14265			0.875157
			1.27793			0.782513
			1.21822			0.820867
			1.1515			0.868436
		H-120	0.900643	0.868619	0.0479641	1.11032	1.15417	0.0660118
			0.909644			1.09933
			0.894231			1.11828
			0.841316			1.18861
			0.797259			1.2543
PAX6-SIMOmCherry/1XcHS4/PAX6-7CE3eGFP	Lchr/1XI/Hgfp	L-72	0.901714	0.82452	0.0568377	1.109	1.21701	0.0809838
			0.8329			1.20062
			0.781058			1.28032
			0.782407			1.27811
		L-120	1.44808	1.13013	0.224996	0.69057	0.916108	0.184238
			1.29295			0.773427
			1.25467			0.797023
			1.20507			0.829827
			0.883455			1.13192
			0.922391			1.08414
			0.90428			1.10585
		H-72	1.97106	1.59834	0.500505	0.507342	0.675028	0.210426
			2.08854			0.478804
			1.16698			0.856916
			1.1668			0.857048
		H-120	2.78307	2.02213	0.609285	0.359315	0.542857	0.18886
			2.67787			0.373431
			2.49087			0.401466
			2.03716			0.490879
			1.25028			0.799821
			1.81986			0.549493
			1.9488			0.513136
			1.16915			0.85532
PAX6-SIMOmCherry/2XcHS4/PAX6-7CE3eGFP	Lchr/2XI/Hgfp	L-72	0.446838	0.461006	0.0185853	2.23795	2.17181	0.0872053
			0.481614			2.07635
			0.44382			2.25317
			0.471752			2.11976
		L-120	0.275499	0.255591	0.0371486	3.62977	3.98263	0.604538
			0.273577			3.65527
			0.222659			4.49118
			0.210078			4.76014
			0.29614			3.37678
		H-72	1.82299	1.60122	0.230743	0.548549	0.633494	0.0936832
			1.61823			0.61796
			1.36245			0.733973
		H-120	2.05214	2.70807	0.570599	0.487295	0.382086	0.0913016
			2.98214			0.33533
			3.08993			0.323632
PAX6-SIMOmCherry/3XcHS4/PAX6-7CE3eGFP	Lchr/3XI/Hgfp	L-72	0.280541	0.327065	0.0484508	3.56454	3.28793	0.303692
			0.299734			3.3363
			0.3375			2.96296
			0.390485
		L-120	0.300357	0.260121	0.0287707	3.32938	3.88863	0.443112
			0.301232			3.3197
			0.251282			3.97959
			0.264744			3.77723
			0.273546			3.65569
			0.283			3.53357
			0.26114			3.82937
			0.249838			4.00259
			0.241454			4.14158
			0.222599			4.49238
			0.21214			4.71387
		H-72	4.23136	3.39283	0.569685	0.236331	0.302081	0.0505634
			3.39519			0.294534
			2.58506			0.386838
			3.03507			0.329482
			2.95172			0.338785
			3.20102			0.3124
			3.64989			0.273981
			4.09335			0.244299
		H-120	3.29418	3.13212	0.585878	0.303566	0.328198	0.0578053
			2.75007			0.363628
			2.50659			0.398949
			2.72061			0.367564
			4.07154			0.245607
			3.44976			0.289875
