# Supplementary material for: Quantitative spatial and temporal assessment of regulatory element activity in zebrafish
Source: eLife. 2021 Nov 19;10:e65601. doi: 10.7554/eLife.65601 (PMC8604437; doi:10.7554/eLife.65601)
Supplement: Figure 5—source data 1. [file elife-65601-fig5-data1.xlsx]

## Sheet: Sheet1
Dual-CRE dual-reporter transgenic line
			Mean G/C	avg G/C	stdev G/C
SHH-SBE2(WT)eGFP/3XcHS4/SHH-SBE2(Mut)mCherry	28hpf	RH	0.715388	0.721444	0.010304						p-values: t-test
			0.721744							RH28 vs RH72	6.40975e-06
			0.726865							CH28 vs CH72	0.00124258
			0.735
			0.708224
		CH	0.715388	0.721444	0.010304
			0.721744
			0.726865
			0.735
			0.708224
	48hpf	RH	3.1327	3.80915	0.508718
			3.33252
			3.67229
			4.08471
			4.32101
			4.31168
		CH	2.49858	2.47964	0.139781
			2.51487
			2.58104
			2.58089
			2.49712
			2.20532
	72hpf	RH	7.04299	7.60026	0.496263
			7.88184
			7.88273
			8.10455
			7.08921
		CH	3.42149	2.77348	0.564414
			3.22758
			2.76649
			2.38152
			2.07031
			Mean C/G	avg C/G	stdev C/G						p-values: t-test
SHH-SBE2(Mut)eGFP/3XcHS4/SHH-SBE2(WT)mCherry	28hpf	RH	1.71311	1.51853	0.234987					RH28 vs RH72	8.40702e-07
			1.83835							CH28 vs CH72	1.9507e-09
			1.88852
			1.86716
			1.79687
			1.74141
			1.6828
			1.61911
			1.12895
			1.2557
			1.32445
			1.37128
			1.4046
			1.40614
			1.40896
			1.3782
			1.34619
			1.3515
			1.32881
	28hpf	CH	1.33697	1.58625	0.272926
			1.37892
			1.39613
			1.40886
			1.40784
			1.38383
			1.34919
			1.28396
			1.32301
			1.37605
			1.46151
			1.61292
			1.74705
			1.86424
			1.95166
			2.00436
			1.9753
			1.99758
			1.87932
	48hpf	RH	1.81594	2.35523	0.353022
			2.41039
			2.73954
			2.87278
			2.7464
			2.47826
			2.25896
			2.11297
			2.05412
			2.06297
	48hpf	CH	1.63791	1.18299	0.576503
			1.84032
			1.76964
			1.69059
			1.65929
			0.853444
			0.537534
			0.521434
			0.74134
			0.578372
	72hpf	RH	2.58338	3.0418	1.12339
			3.61433
			4.39955
			4.64115
			4.45682
			3.62025
			3.00924
			2.36462
			2.04642
			3.33313
			2.49778
			1.80842
			1.40453
			2.56922
			2.09073
			1.92615
			1.70157
			5.65226
			4.73034
			3.92155
			3.22709
			2.6885
			2.44302
			2.27322
	72hpf	CH	1.9218	2.20512	0.288175
			2.13069
			2.27148
			2.25693
			2.26475
			2.21596
			2.19397
			2.17636
			2.16312
			2.13752
			2.1173
			2.08118
			2.01721
			1.34653
			1.61275
			1.59879
			2.59226
			2.52521
			2.46667
			2.44963
			2.3744
			2.27254
			2.25725
			2.1713
			1.79287
			2.04625
			2.21673
			2.39017
			2.45169
			2.47772
			2.51801
			2.50866
			2.50153
			2.45484
