# Supplementary material for: Quantitative spatial and temporal assessment of regulatory element activity in zebrafish
Source: eLife. 2021 Nov 19;10:e65601. doi: 10.7554/eLife.65601 (PMC8604437; doi:10.7554/eLife.65601)
Supplement: Supplementary file 1. [file elife-65601-supp1.xlsx]

## Sheet: Sheet1
Landing pad vector
Landing pad vector
Insert (tracking CRE)	Genomic location	Template for amplification	Primer 1	Primer 2	Entry vector
Shh-SBE2	mm10/chr5:28875757-28876594	Genomic DNA	5’-attB4-GCCGTGATAAACCTTCTCCA-3’	5’-attB1r-GCCATCACATGGTGTTTGTG-3’	pDONR-P4P1r
SOX9-CNEa	hg19/chr17:68698215-68699574	Genomic DNA	5’-attB4-CAGTGCCCTCAGTCAGGTCT-3’	5’-attB1r-TTACCCTTACCCTCCAGCTGT-3’	pDONR-P4P1r
Pax6-SIMO	mm10/chr2:105779239-105780038	Genomic DNA	5’-attB4-GGCGCGCCATGTACAGTCTGATGACT-3’	5’-attB1r-CTTGAGTATTTCAGCACT-3’	pDONR-P4P1r
Dual-CRE dual-reporter replacement vector
Insert	Genomic location		Primer 1	Primer 2	Entry vector
PAX6-SIMO	hg19/chr11:31685344-31686173	Genomic DNA	5’-attB4-GGCGCGCCTTTCTCAGGAAGAAATCAGGT 3’	5’-attB1r-CTATAGGATGCTGTAGTTGG 3’	pDONR-P4P1r
			5’-attB2-GGCGCGCCTTTCTCAGGAAGAAATCAGGT 3’	5’-attB3r-CTATAGGATGCTGTAGTTGG 3’	pDONR-P2rP3
PAX6-7CE3	hg19/chr11:31817398-31818219	Genomic DNA	5'attB4-AAATGACCCCCAAGGGATAC-3'	5'-attB1r-CCTCCCCTCCATCTCCTCTA-3'	pDONR-P4P1r
			5'attB2-AAATGACCCCCAAGGGATAC-3'	5'-attB3r-CCTCCCCTCCATCTCCTCTA-3'	pDONR-P2rP3
Shh-SBE2	mm10/chr5:28875757-28876594	Genomic DNA	5’-attB4-GCCGTGATAAACCTTCTCCA-3’	5’-attB1r-GCCATCACATGGTGTTTGTG-3’	pDONR-P4P1r
Shh-SBE4	mm10/chr5:28785234-28786312	Genomic DNA	5’-attB2-GCTCTGCTCATCCCCACTTT3’	5’-attB3r-TTGCTGAGTGACTGATGCCT3’	pDONR-P2rP3
SHH-SBE2(WT)	hg19/chr7:156061034-156062258	Plasmids generated in Bhatia et.al 2015 [5]	5’-attB4-GCCTAGCGTTTCCAACATGCAGCC 3’	5’-attB1r-TACGGCTCTAACAGTAAAGCACTC 3’	pDONR-P4P1r
SHH-SBE2(Mut)	hg19/chr7:156061034-156062258	Plasmids generated in Bhatia et.al 2015 [5]	5’-attB2-GCCTAGCGTTTCCAACATGCAGCC 3’	5’-attB3r-TACGGCTCTAACAGTAAAGCACTC 3’	pDONR-P2rP3
Neutral	mm10/chr2:105733498-105733990	Genomic DNA	5’-attB1-CCATGCTCCTCAGTAATCCT 3’	5’-attB2-GTCATGGACAGGTCATGGCC 3’	pDONR221
cHS4	galGal6/chr1:197299749-197300121	Genomic DNA	5’-attB1-TTTCCTGGAAGGTCCTGGAAG-3'	5’-attB2-CAGCTGCACATAGCAGGGGGTTG-3’	pDONR221
LM-PCR
Primer name	Sequence
NlaIII linker+	5’-GTAATACGACTCACTATAGGGCTCCGCTTAAGG GACCATG-3’
NlaIII linker-	5’-Phos-GTCCCTTAAGCGGAG-C3spacer-3’
DpnII linker +	5′GTAATACGACTCACTATAGGGCTCCGCTTAAGGGAC3′
DpnII linker -	5’-Phos-GATCGTCCCTTAAGCGGAG-C3spacer-3’
BfaI linker+	5’-GTAATACGAC TCACTATAGGGCTCCGCTTAAGGGAC-3’
BfaI linker-	5’-Phos-TAGTCCCTTAAGCGGAG-C3spacer-3’
Linker primer 1	5′GTAATACGACTCACTATAGGGC3′
Linker primer 2	5′AGGGCTCCGCTTAAGGGAC3′
Tol2 Left 1.1	5′TCAAGTAAAGTAAAAATCCCCAAAA3′
Tol2 Right 1.1	5′TTGAGTAAAATTTTCCCTAAGTAC3′
Tol2 Left 2.1	5′AAAATCCCCAAAAATAATACTTAAGTACAGTAA3′
Tol2 Right 2.1	5′TGTACTTTCACTTGAGTAAAATTTTTGAG3′
Genotyping primers
	Genomic DNA	Sequence
SP1	Danio rerio	5' GTGCGTACTCACCTTGACAC 3'		LS FP1
SP2	NA	5' CCCTGAAGTTCATCTGCACCA 3'		pr 269
SP3	NA	5' AGGGCGAGGAGGATAACATG 3'		mcherryfw new
SP4	Danio rerio	5' ACTATCGACTCAGGAAGCGG 3'		LSRP1
SP5	NA	5' TGGTGCAGATGAACTTCAGGG 3'		gfpseq1
SP6	Mus musculus	5’ GCCATCACATGGTGTTTGTG 3’		msbe2 rp
SP7	Mus musculus	5’ GGCTCTGCTCATCCCCACTTT 3’		msbe4 fp
SP8	NA	5' TCACGTAGGCCTTGGAGCCGT 3'		cherry seq1
SP9	Mus musculus	5’ GCCGTGATAAACCTTCTCCA 3’		msbe2 fp
SP10	Mus musculus	5’ GCCATCACATGGTGTTTGTG 3’		msbe2 rp
SP11	Mus musculus	5’ GGCTCTGCTCATCCCCACTTT 3’		msbe4 fp
SP12	Mus musculus	5’ TTGCTGAGTGACTGATGCCT 3’		msbe4 rp
